# Supplementary material for: Prevention of acute kidney injury through accurate fluid balance monitoring
Source: PubMed Central journal article supplement — BMJ Open Qual. 2017 Nov 25;6(2):e000006. doi: 10.1136/bmjoq-2017-000006 (PMC5717957; doi:10.1136/bmjoq-2017-000006), 2017-11-25
Supplement: bmjoq-2017-000006supp001.pdf [file bmjoq-2017-000006supp001.pdf]

# Fluid Balance

...../...../.....

| Patient details (or affix label)                                                                 |    | Time (hour starting) | INPUT (ml) |          |       |                              |               | OUTPUT (ml) |       |          |                  |               |
|--------------------------------------------------------------------------------------------------|----|----------------------|------------|----------|-------|------------------------------|---------------|-------------|-------|----------|------------------|---------------|
|                                                                                                  |    |                      | Oral fluid | IV fluid | Blood | Other e.g. NG, IV drugs, TPN | Running Total | Urine       | Drain | Aspirate | Other e.g. Stoma | Running Total |
| Surname:                                                                                         |    | 00:00                |            |          |       |                              |               |             |       |          |                  |               |
|                                                                                                  |    | 01:00                |            |          |       |                              |               |             |       |          |                  |               |
| First Names:                                                                                     |    | 02:00                |            |          |       |                              |               |             |       |          |                  |               |
|                                                                                                  |    | 03:00                |            |          |       |                              |               |             |       |          |                  |               |
| Hospital Number:                                                                                 |    | 04:00                |            |          |       |                              |               |             |       |          |                  |               |
|                                                                                                  |    | 05:00                |            |          |       |                              |               |             |       |          |                  |               |
|                                                                                                  |    | <b>6 hour total</b>  |            |          |       |                              |               |             |       |          |                  |               |
| D.O.B.:                                                                                          |    | 06:00                |            |          |       |                              |               |             |       |          |                  |               |
|                                                                                                  |    | 07:00                |            |          |       |                              |               |             |       |          |                  |               |
|                                                                                                  |    | 08:00                |            |          |       |                              |               |             |       |          |                  |               |
|                                                                                                  |    | 09:00                |            |          |       |                              |               |             |       |          |                  |               |
|                                                                                                  |    | 10:00                |            |          |       |                              |               |             |       |          |                  |               |
|                                                                                                  |    | 11:00                |            |          |       |                              |               |             |       |          |                  |               |
| <b>If Urine Output &lt; 0.5ml/kg/hr for &gt; 6 consecutive hours bleep medical team urgently</b> |    | <b>12 hour total</b> |            |          |       |                              |               |             |       |          |                  |               |
|                                                                                                  |    | 12:00                |            |          |       |                              |               |             |       |          |                  |               |
|                                                                                                  |    | 13:00                |            |          |       |                              |               |             |       |          |                  |               |
|                                                                                                  |    | 14:00                |            |          |       |                              |               |             |       |          |                  |               |
| Patients weight:                                                                                 |    | 15:00                |            |          |       |                              |               |             |       |          |                  |               |
| Actual: <input type="text"/>                                                                     |    | 16:00                |            |          |       |                              |               |             |       |          |                  |               |
| Estimated: <input type="text"/>                                                                  |    | 17:00                |            |          |       |                              |               |             |       |          |                  |               |
|                                                                                                  |    | <b>18 hour total</b> |            |          |       |                              |               |             |       |          |                  |               |
| Expected hourly urine output (0.5ml/kg/hour)                                                     | ml | 18:00                |            |          |       |                              |               |             |       |          |                  |               |
|                                                                                                  |    | 19:00                |            |          |       |                              |               |             |       |          |                  |               |
|                                                                                                  |    | 20:00                |            |          |       |                              |               |             |       |          |                  |               |
|                                                                                                  |    | 21:00                |            |          |       |                              |               |             |       |          |                  |               |
| Example: expected hourly urine output in 60kg patient: 60 x 0.5 = 30ml/hour                      |    | 22:00                |            |          |       |                              |               |             |       |          |                  |               |
|                                                                                                  |    | 23:00                |            |          |       |                              |               |             |       |          |                  |               |
|                                                                                                  |    | <b>24 hour total</b> |            |          |       |                              |               |             |       |          |                  |               |
