# Supplementary material for: Prevention of acute kidney injury through accurate fluid balance monitoring
Source: PubMed Central journal article supplement — BMJ Open Qual. 2017 Nov 25;6(2):e000006. doi: 10.1136/bmjoq-2017-000006 (PMC5717957; doi:10.1136/bmjoq-2017-000006), 2017-11-25

# Trauma ward total monthly AKI alerts

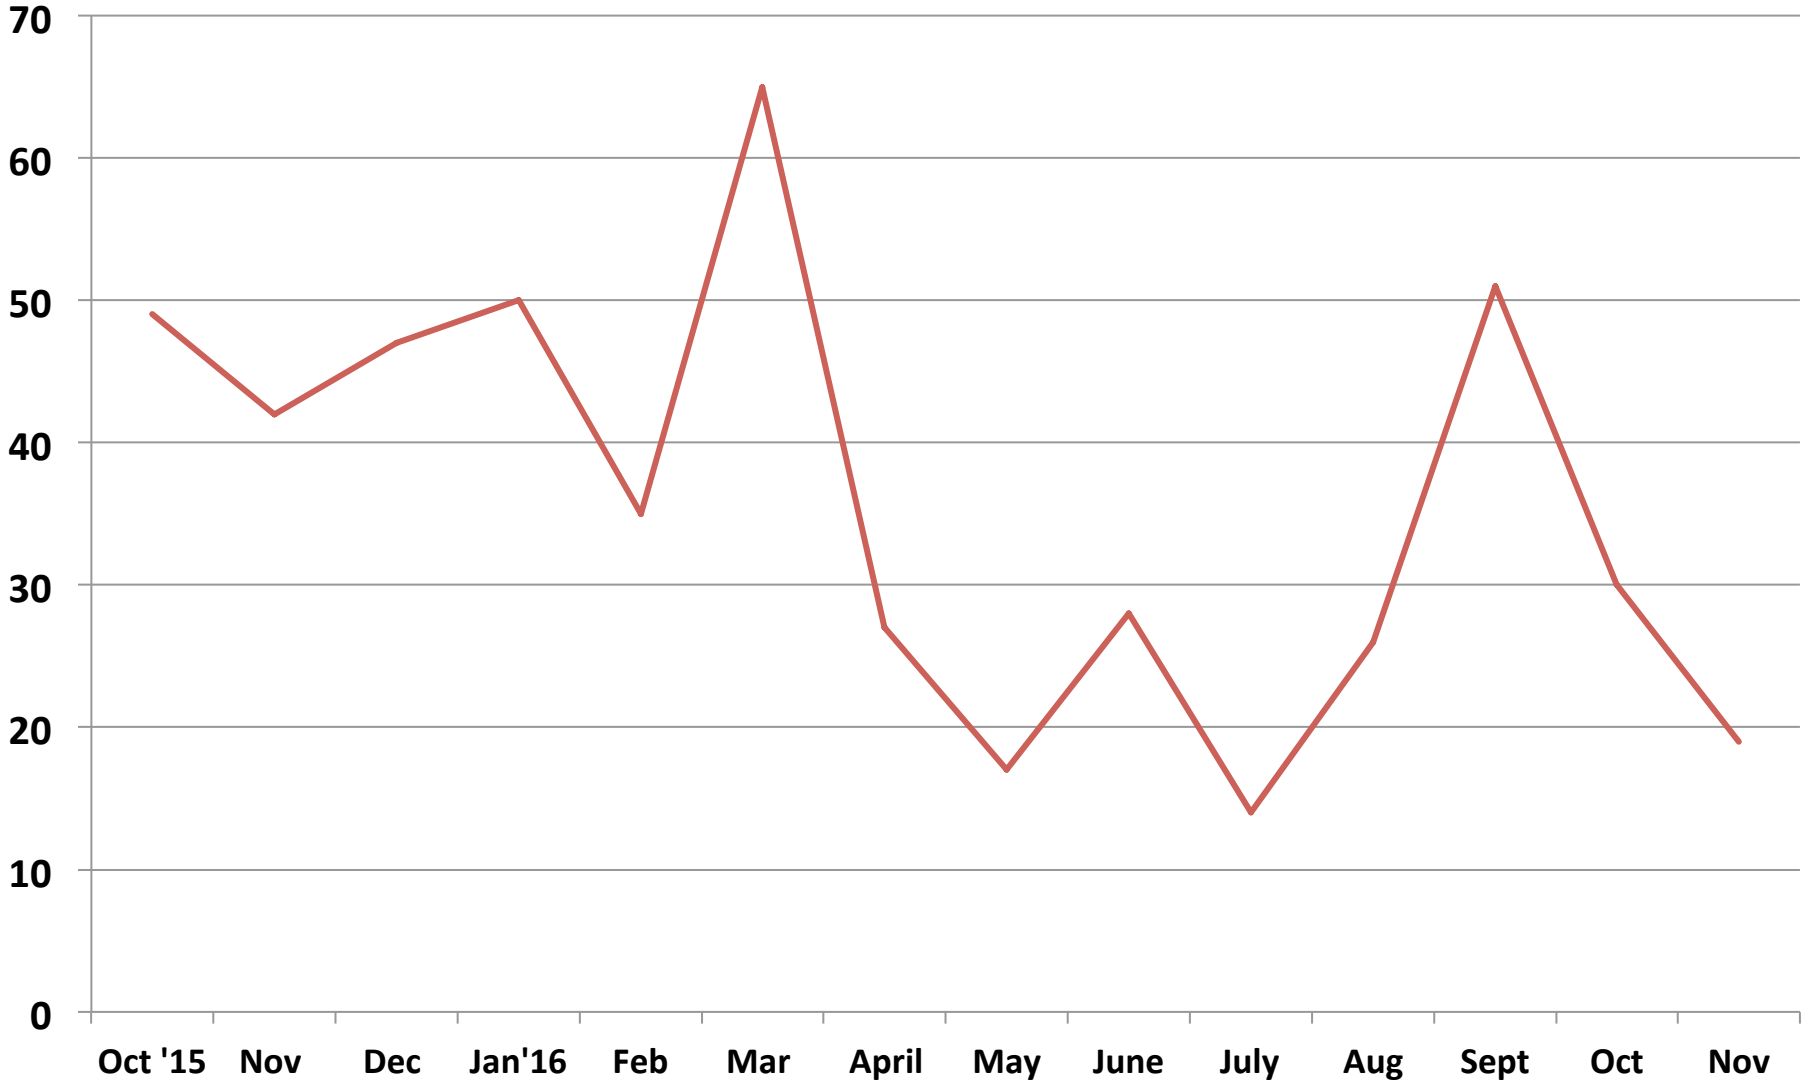

# Trauma ward fluid balance documentation

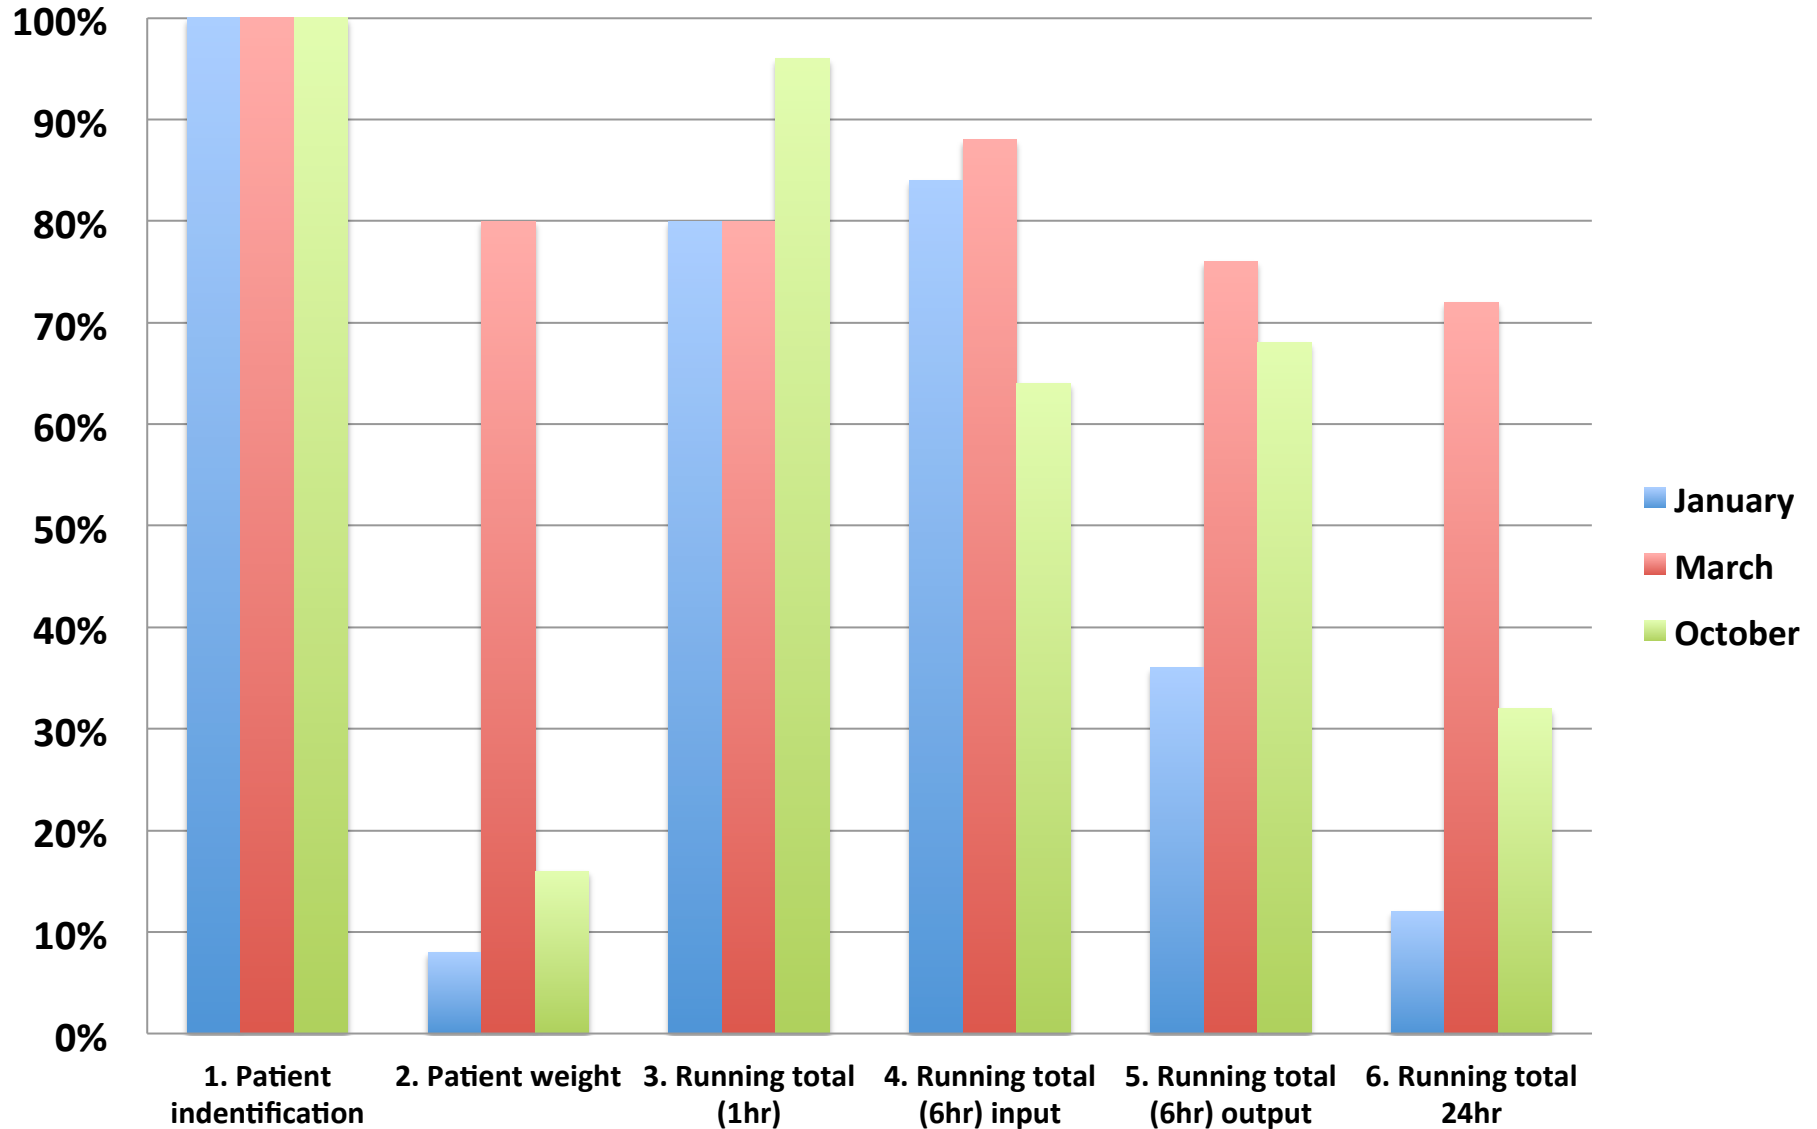

# New trauma ward admissions

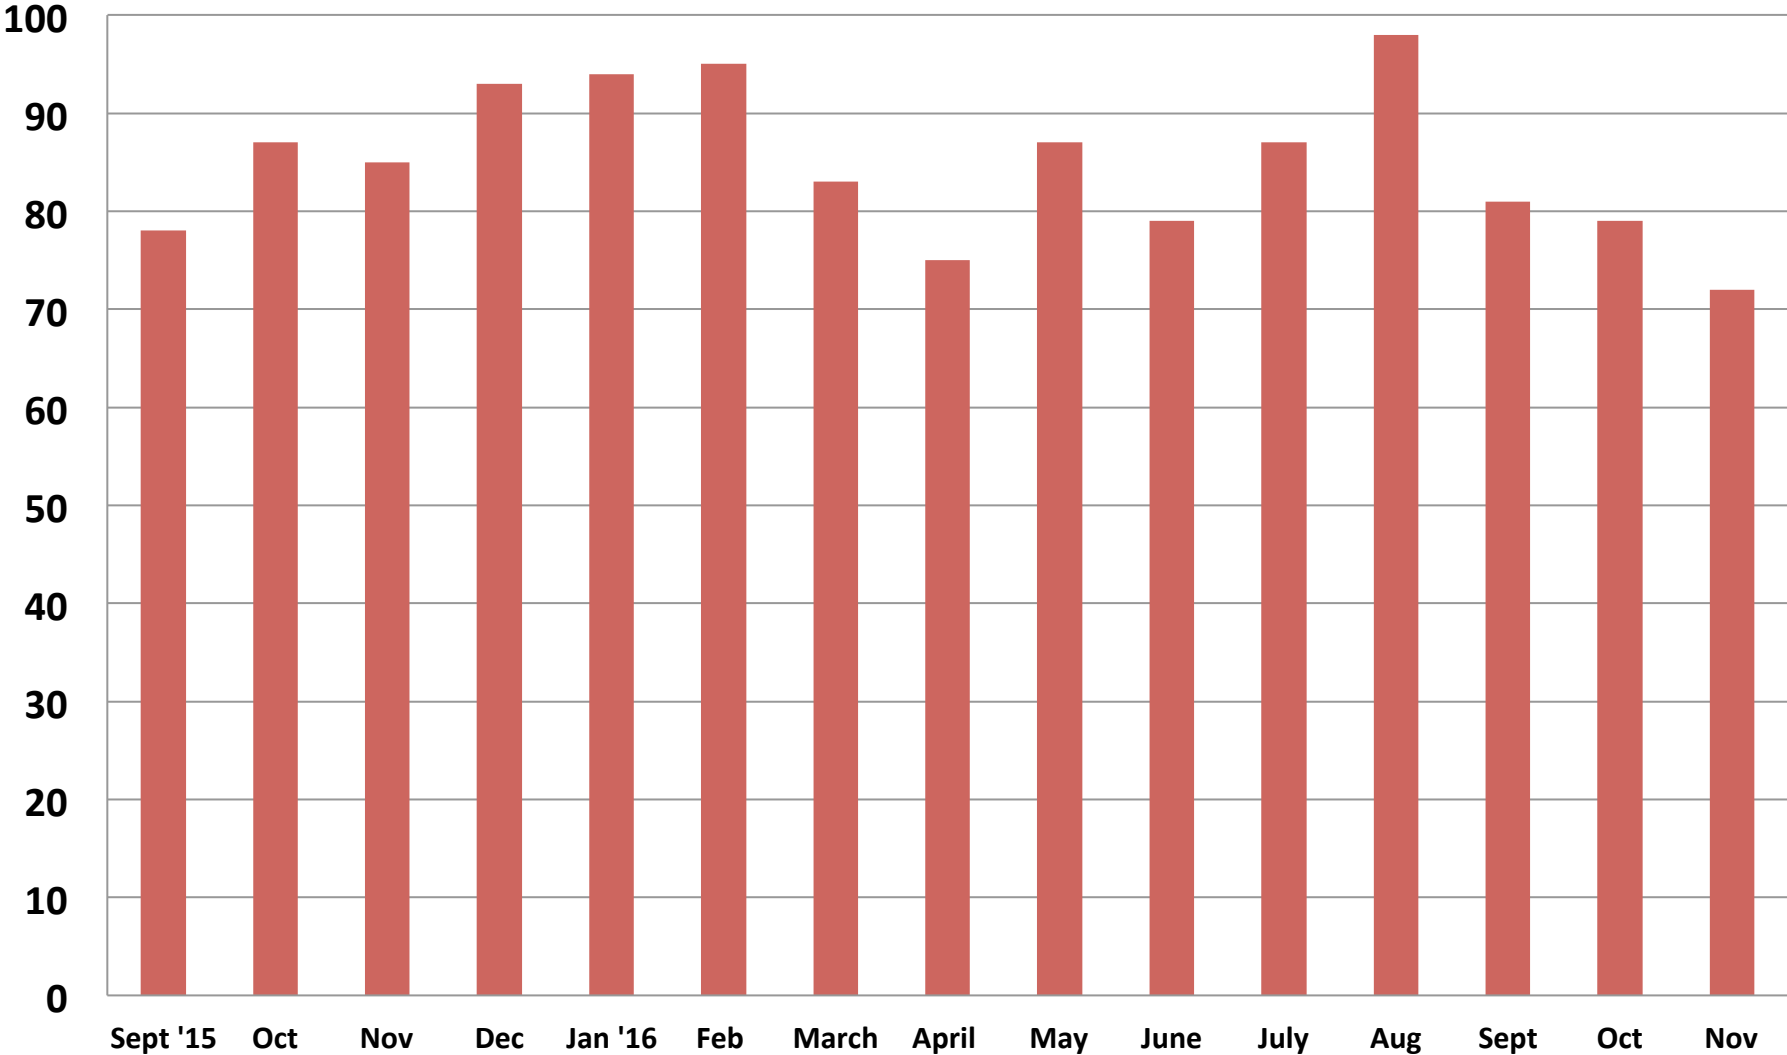

Supplement: bmjoq-2017-000006supp002.pdf [file bmjoq-2017-000006supp002.pdf]
